# Supplementary material
Source: PubMed Central journal article supplement (PMC8026558)

Supplementary Figure. S3

A

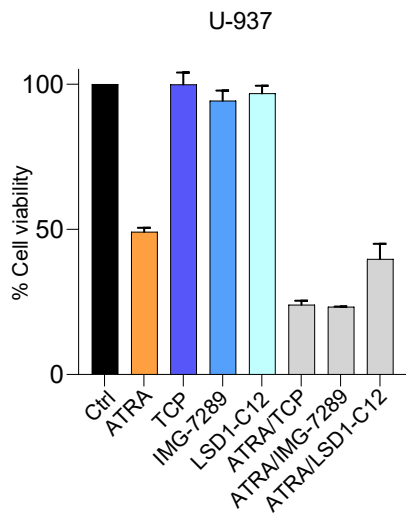

B

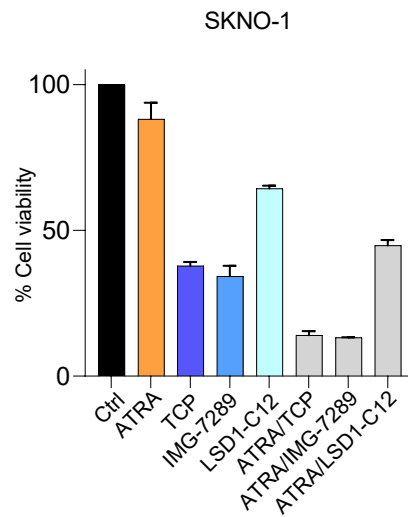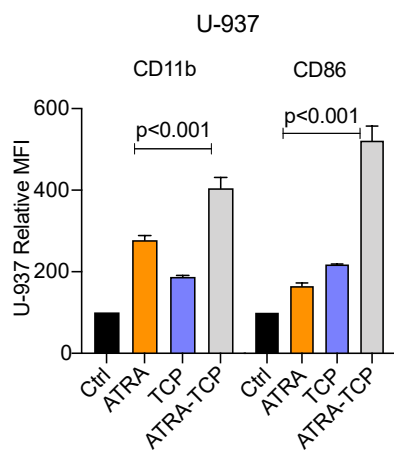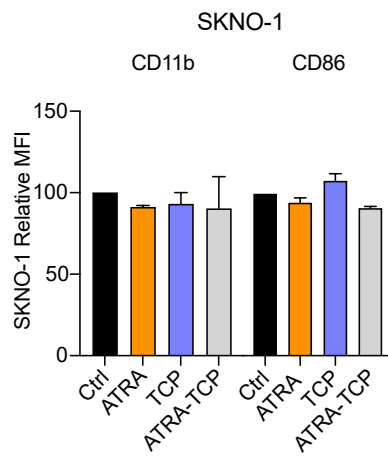

Supplementary Figure S3

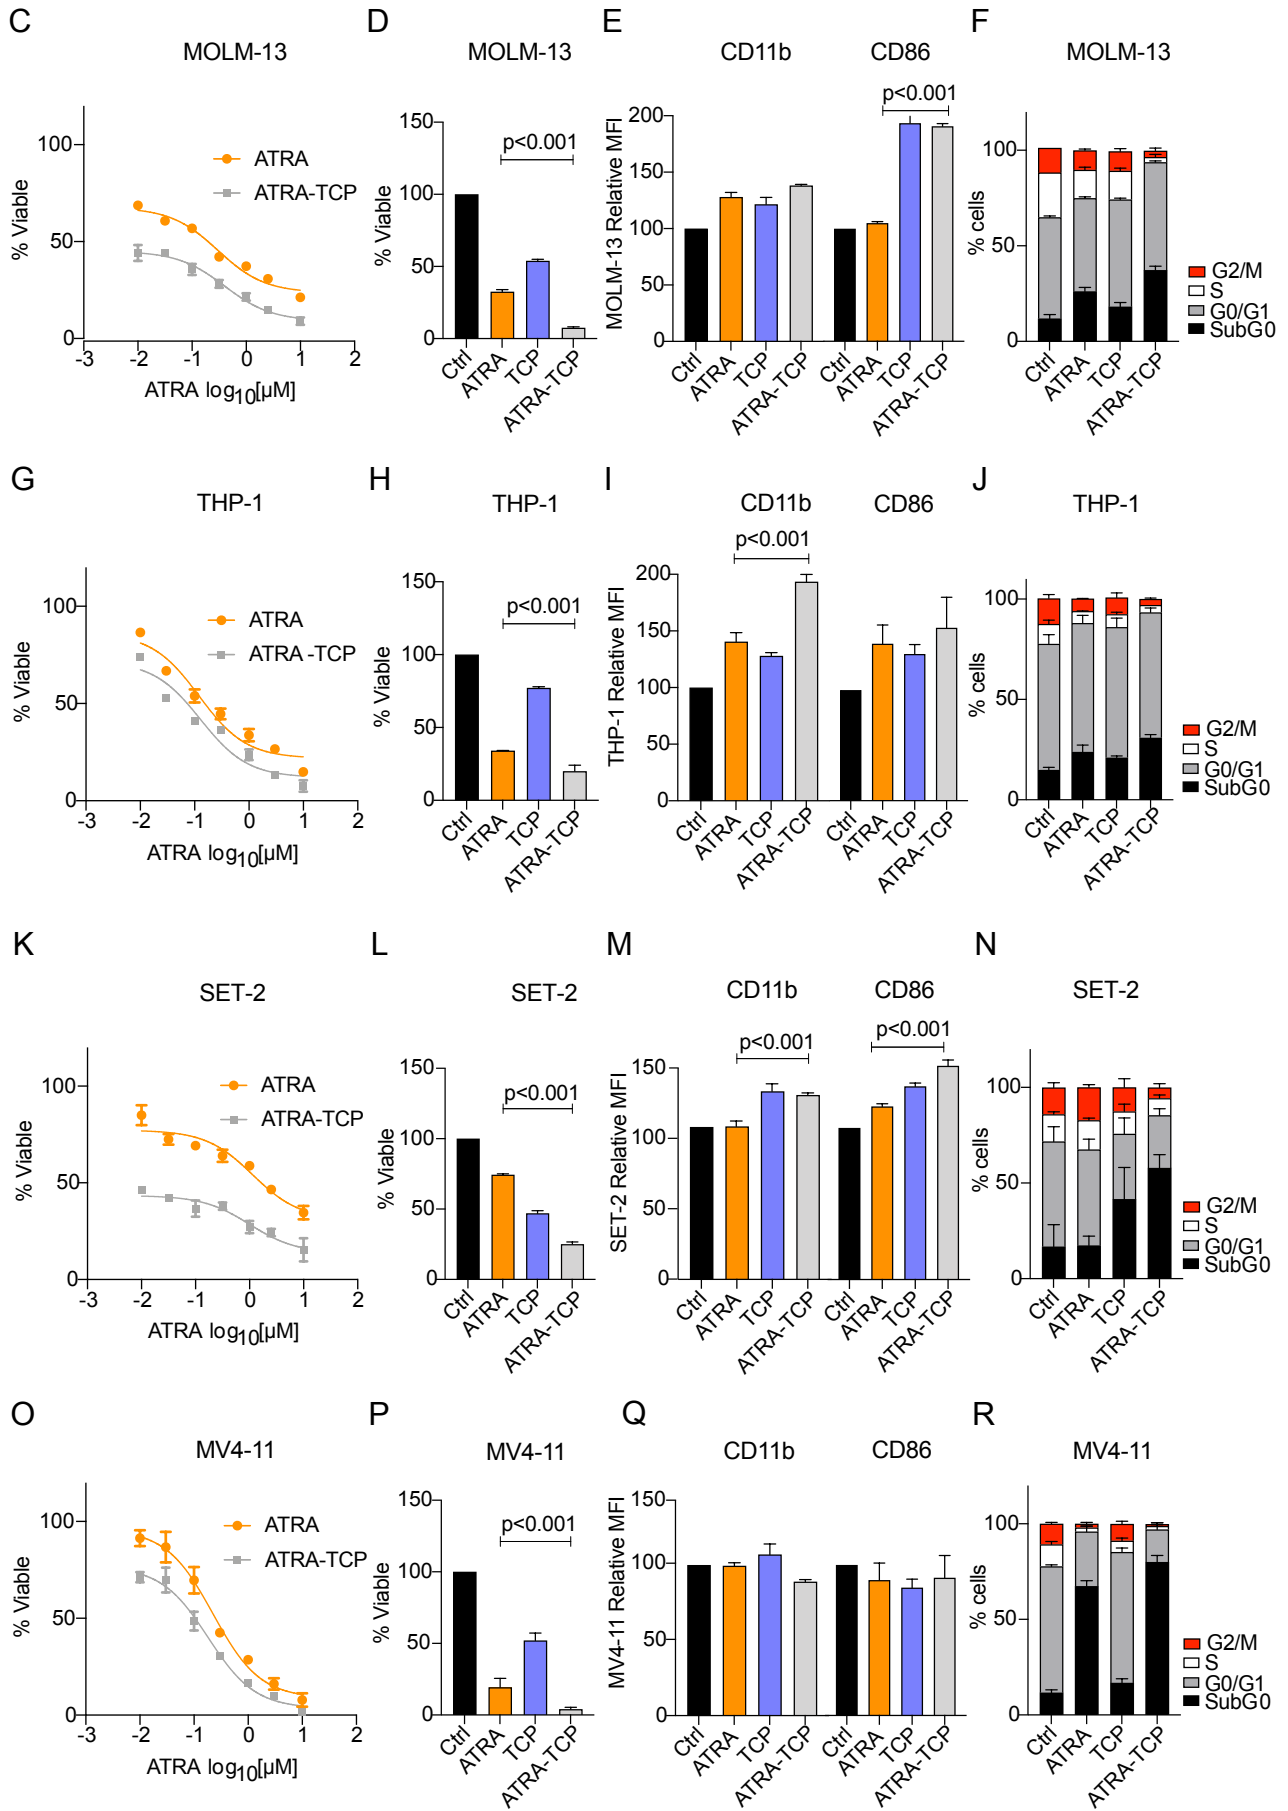

# Supplementary Figure S3

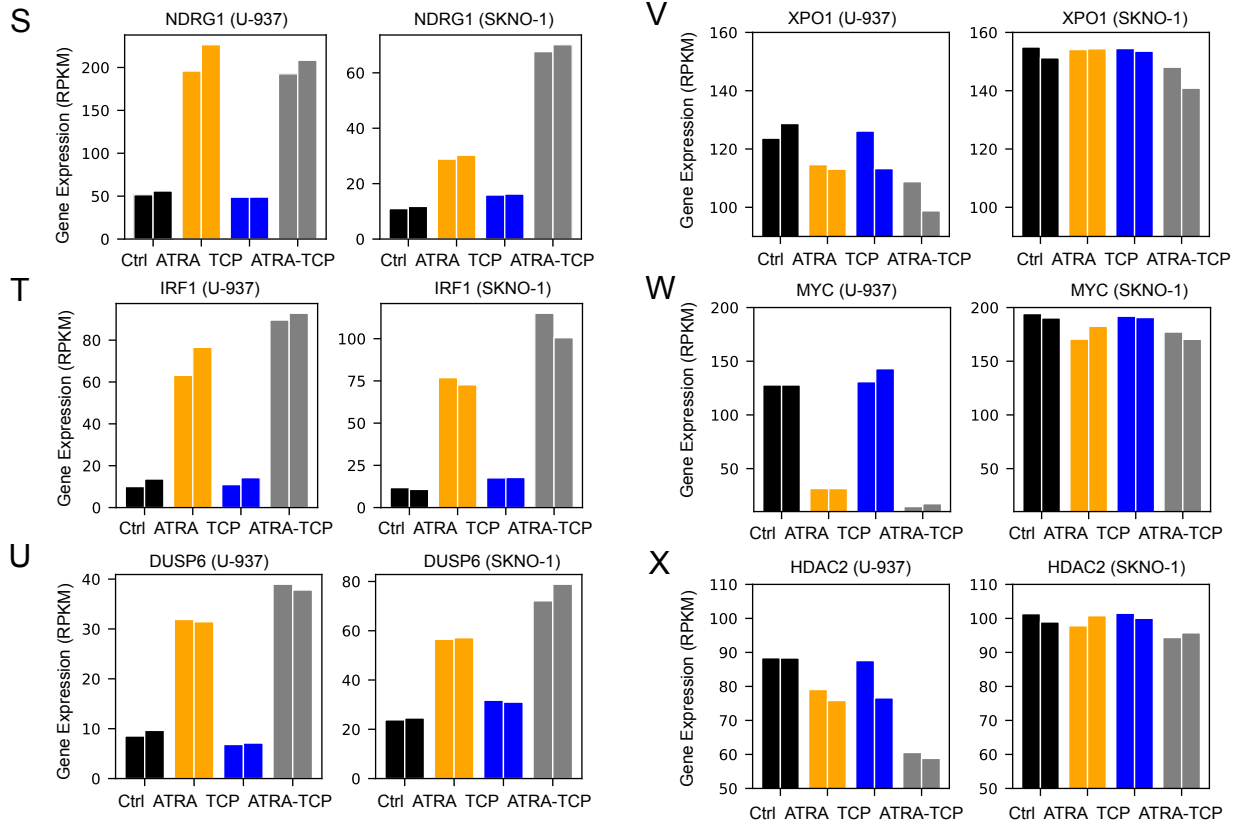

Supplement: NIHMS1666781-supplement-12.pdf [file NIHMS1666781-supplement-12.pdf]
